# Supplementary material for: Microbial diversity in individuals and their household contacts following typical antibiotic courses
Source: PubMed Central journal article supplement (PMC4967329; doi:10.1186/s40168-016-0187-9), 2016-07-30
Supplement: 40168_2016_187_MOESM1_ESM.pdf [file 40168_2016_187_MOESM1_ESM.pdf]

**Table S1: Study Subjects**

| Subjects | Household | Antibiotic   | Roommate or Couple | Days of therapy | Ethnicity | Age | Sex | Dropped out at 6 months | Side Effects or Complications | Household Pet | Vegetarian | Medication Allergies |
|----------|-----------|--------------|--------------------|-----------------|-----------|-----|-----|-------------------------|-------------------------------|---------------|------------|----------------------|
| CA05     | a         | Amoxicillin  | Couple             | 7               | Caucasian | 23  | F   | No                      | None                          | None          | No         | None                 |
| CA06     | a         | Placebo      | Couple             | 7               | Caucasian | 24  | M   | No                      | None                          |               | No         | Penicillin           |
| CA07     | b         | Amoxicillin  | Couple             | 7               | Asian     | 23  | M   | Yes                     | None                          | None          | No         | None                 |
| CA08     | b         | Placebo      | Couple             | 7               | Asian     | 22  | F   | Yes                     | None                          |               | No         | Penicillin           |
| CA09     | c         | Amoxicillin  | Roommate           | 3               | Caucasian | 26  | M   | No                      | None                          | 4 dogs        | No         | None                 |
| CA10     | c         | Placebo      | Roommate           | 3               | Caucasian | 22  | M   | No                      | None                          |               | Yes        | None                 |
| CA11     | d         | Azithromycin | Couple             | 7               | Asian     | 19  | F   | Yes                     | None                          | None          | No         | None                 |
| CA12     | d         | Placebo      | Couple             | 7               | Latino    | 20  | M   | Yes                     | None                          |               | No         | None                 |
| CA13     | e         | Amoxicillin  | Couple             | 3               | Caucasian | 31  | F   | No                      | None                          | 1 dog         | No         | None                 |
| CA14     | e         | Placebo      | Couple             | 3               | Caucasian | 27  | F   | No                      | None                          |               | No         | None                 |
| CA15     | f         | Azithromycin | Roommate           | 7               | Asian     | 24  | M   | Yes                     | None                          | None          | No         | None                 |
| CA16     | f         | Placebo      | Roommate           | 7               | Asian     | 21  | M   | Yes                     | None                          |               | No         | None                 |
| CA17     | g         | Amoxicillin  | Couple             | 3               | Asian     | 19  | M   | No                      | None                          | None          | No         | None                 |
| CA18     | g         | Placebo      | Couple             | 3               | Asian     | 19  | F   | No                      | None                          |               | Yes        | None                 |
| CA19     | h         | Amoxicillin  | Roommate           | 3               | Caucasian | 24  | M   | No                      | None                          | 1 cat         | No         | Sulfa                |
| CA20     | h         | Placebo      | Roommate           | 3               | Caucasian | 26  | M   | No                      | None                          |               | No         | Penicillin           |
| CA21     | i         | Amoxicillin  | Roommate           | 7               | Latino    | 22  | F   | Yes                     | None                          | 1 cat         | No         | None                 |
| CA22     | i         | Placebo      | Roommate           | 7               | Asian     | 21  | F   | Yes                     | None                          |               | No         | None                 |
| CA23     | j         | Amoxicillin  | Couple             | 7               | Caucasian | 34  | M   | No                      | None                          | 1 dog         | No         | None                 |
| CA24     | j         | Placebo      | Couple             | 7               | Caucasian | 21  | M   | No                      | None                          |               | No         | Penicillin           |
| CA25     | k         | Amoxicillin  | Roommate           | 3               | Latino    | 22  | F   | No                      | None                          | 1 hamster     | No         | None                 |
| CA26     | k         | Placebo      | Roommate           | 3               | Latino    | 23  | F   | No                      | None                          |               | No         | None                 |
| CA27     | l         | Amoxicillin  | Couple             | 7               | Caucasian | 24  | M   | No                      | None                          | None          | No         | None                 |
| CA28     | l         | Placebo      | Couple             | 7               | Caucasian | 24  | F   | No                      | None                          |               | No         | Penicillin           |
| CA29     | m         | Amoxicillin  | Roommate           | 7               | Caucasian | 23  | F   | No                      | None                          | None          | No         | None                 |
| CA30     | m         | Placebo      | Roommate           | 7               | Caucasian | 23  | F   | No                      | None                          |               | No         | None                 |
| CA31     | n         | Amoxicillin  | Couple             | 3               | Caucasian | 27  | M   | No                      | None                          | None          | No         | None                 |
| CA32     | n         | Placebo      | Couple             | 3               | Caucasian | 26  | F   | No                      | None                          |               | No         | None                 |
| CA33     | o         | Azithromycin | Roommate           | 3               | Latino    | 26  | F   | No                      | None                          | None          | No         | None                 |
| CA34     | o         | Placebo      | Roommate           | 3               | Caucasian | 45  | F   | No                      | None                          |               | No         | Penicillin           |
| CA35     | p         | Azithromycin | Couple             | 3               | Latino    | 22  | F   | No                      | None                          | 2 dogs        | No         | None                 |

|      |      |              |          |   |           |    |   |     |               |        |    |      |
|------|------|--------------|----------|---|-----------|----|---|-----|---------------|--------|----|------|
| CA36 | p    | Placebo      | Couple   | 3 | Latino    | 24 | M | No  | None          |        | No | None |
| CA37 | q    | Azithromycin | Roommate | 7 | Caucasian | 21 | M | No  | Mild diarrhea | 1 cat  | No | None |
| CA38 | q    | Placebo      | Roommate | 7 | Caucasian | 22 | M | No  | None          |        | No | None |
| CA39 | r    | Azithromycin | Roommate | 7 | Asian     | 63 | M | No  | None          | None   | No | None |
| CA40 | r    | Placebo      | Roommate | 7 | Latino    | 60 | M | No  | None          |        | No | None |
| CA43 | t    | Azithromycin | Couple   | 3 | Caucasian | 21 | F | No  | None          | 2 dogs | No | None |
| CA44 | t    | Placebo      | Couple   | 3 | Caucasian | 21 | M | No  | None          |        | No | None |
| CA47 | v    | Azithromycin | Couple   | 7 | Caucasian | 24 | M | No  | None          | 1 dog  | No | None |
| CA48 | v    | Placebo      | Couple   | 7 | Caucasian | 25 | F | No  | None          |        | No | None |
| CA49 | w    | Azithromycin | Couple   | 3 | Caucasian | 26 | M | Yes | None          | 1 dog  | No | None |
| CA50 | w    | Placebo      | Couple   | 3 | Caucasian | 26 | F | Yes | None          |        | No | None |
| CA53 | y    | Azithromycin | Couple   | 7 | Caucasian | 20 | F | No  | None          | 2 cats | No | None |
| CA54 | y    | Placebo      | Couple   | 7 | Caucasian | 21 | M | No  | None          |        | No | None |
| CA55 | z    | Azithromycin | Roommate | 3 | Latino    | 28 | F | No  | None          | 1 dog  | No | None |
| CA56 | z    | Placebo      | Roommate | 3 | Latino    | 25 | F | No  | None          |        | No | None |
| CA57 | aa   | Azithromycin | Roommate | 3 | Latino    | 30 | F | No  | None          | 2 fish | No | None |
| CA58 | aa   | Placebo      | Roommate | 3 | Latino    | 57 | M | No  | None          |        | No | None |
| CA02 | None | None         | Neither  | 0 | Latino    | 20 | F | No  | None          | 1 dog  | No | None |
| CA81 | None | None         | Neither  | 0 | Caucasian | 19 | F | No  | None          | None   | No | None |
| CA83 | None | None         | Neither  | 0 | Asian     | 20 | M | No  | None          | 1 dog  | No | None |
| CA84 | None | None         | Neither  | 0 | Caucasian | 24 | M | No  | None          | None   | No | None |
| CA85 | None | None         | Neither  | 0 | Asian     | 21 | M | No  | None          | 1 dog  | No | None |
| CA86 | None | None         | Neither  | 0 | Caucasian | 51 | M | No  | None          | None   | No | None |
| CA87 | None | None         | Neither  | 0 | Latino    | 28 | F | No  | None          | None   | No | None |
| CA89 | None | None         | Neither  | 0 | Asian     | 19 | F | No  | None          | None   | No | None |
